# Supplementary material
Source: Research Square preprint supplement (doi:10.21203/rs.3.rs-10240921/v1)
Supplement: Supplementary file 1 [file 4c43973427a975852de74446.docx]

**Enhancing Urban Food System Resilience through Urban Spatial Resources: A Case Study of Stockholm City**

Abdur Rashid Jamalzi1, Vivek Anand Voora1, Cameron Kennett1, 2, Michael Alan Martin1, 2*

1 IVL Swedish Environmental Research Institute, PO Box 210 60, Stockholm, SE-100 31, Sweden

2 KTH Royal Institute of Technology, Department of Sustainable Development, Environmental Science and Engineering, Stockholm, Sweden.

*****Corresponding author. E-mail address: [michael.martin@ivl.se](mailto:michael.martin@ivl.se) (Michael A Martin).

***Table S1.*** Crop-specific yield assumptions (kg m⁻² year⁻¹) used for estimating annual vegetables production potential scenarios.

| Crop | Yield  (kg m⁻² year⁻¹) | Production context | Source |
| --- | --- | --- | --- |
| Tomatoes | 35.0 | High-latitude greenhouse production in northern Sweden | Ljungqvist et al. (2021) |
| Cucumbers | 30.0 | Commercial greenhouse production | Ottosson & Hansson, 1981 |
| Lettuce | 41 | Controlled-environment hydroponic cultivation | Barbosa et al. (2015) |
| Bell peppers | 30.0 | Commercial greenhouse production | Dutch Greenhouse Industry Report |
| Basil | 16.25 | Hydroponic cultivation systems, 3.36 kg/m2 per harvest. | Malik, O. H. (2021) |
| Kale | 19.6 | Aquaponic production systems | Afolabi, 2019 |
| Potatoes | 4.36 | Swedish field production (national statistics) | Statistics Sweden (SCB), 2022 |
| Carrots | 6.20 | Swedish field production averages | Selina Wamucii. (2023) |
| Beets | 7.25 | Swedish field crop yield averages | Statistics Sweden (SCB), 2025 |
| Leeks | 2.10 | Northern European field production averages | Statistics Norway |

***Table S2.*** Potential spatial resources for urban agriculture in Stockholm City.

| District Name | Potential Rooftops for Commercial Agriculture (ha) | Potential Rooftops for Small-scale Agriculture (ha) | Gardens  (ha) | Arable  (ha) | Parking lots 10% (ha) |
| --- | --- | --- | --- | --- | --- |
| Bromma | 104.12 | 25.73 | 69.5 | 21.5 | 6.3 |
| Enskede-Årsta-Vantör | 50.78 | 35.52 | 15.4 | 0 | 5.8 |
| Farsta | 19.92 | 20.07 | 23.1 | 0 | 6.7 |
| Hägersten-Älvsjö | 63.91 | 24.38 | 3.1 | 0 | 5.7 |
| Hässelby-Vällingby | 19.09 | 20.25 | 10.6 | 8.6 | 5.3 |
| Järva | 80.25 | 30.72 | 40.7 | 74.4 | 10.6 |
| Kungsholmen | 16.31 | 3.45 | 0.4 | 0 | 0.6 |
| Norra innerstaden | 37.87 | 22.23 | 4.7 | 23.0 | 4.7 |
| Södermalm | 10.33 | 7.91 | 11.7 | 0 | 1.1 |
| Skarpnäck | 7.19 | 7.14 | 98.8 | 0 | 2.1 |
| Skärholmen | 16.18 | 19.01 | 1.3 | 0 | 4.2 |
| Total | 425.95 | 216.41 | 279.3 | 127.5 | 53.2 |


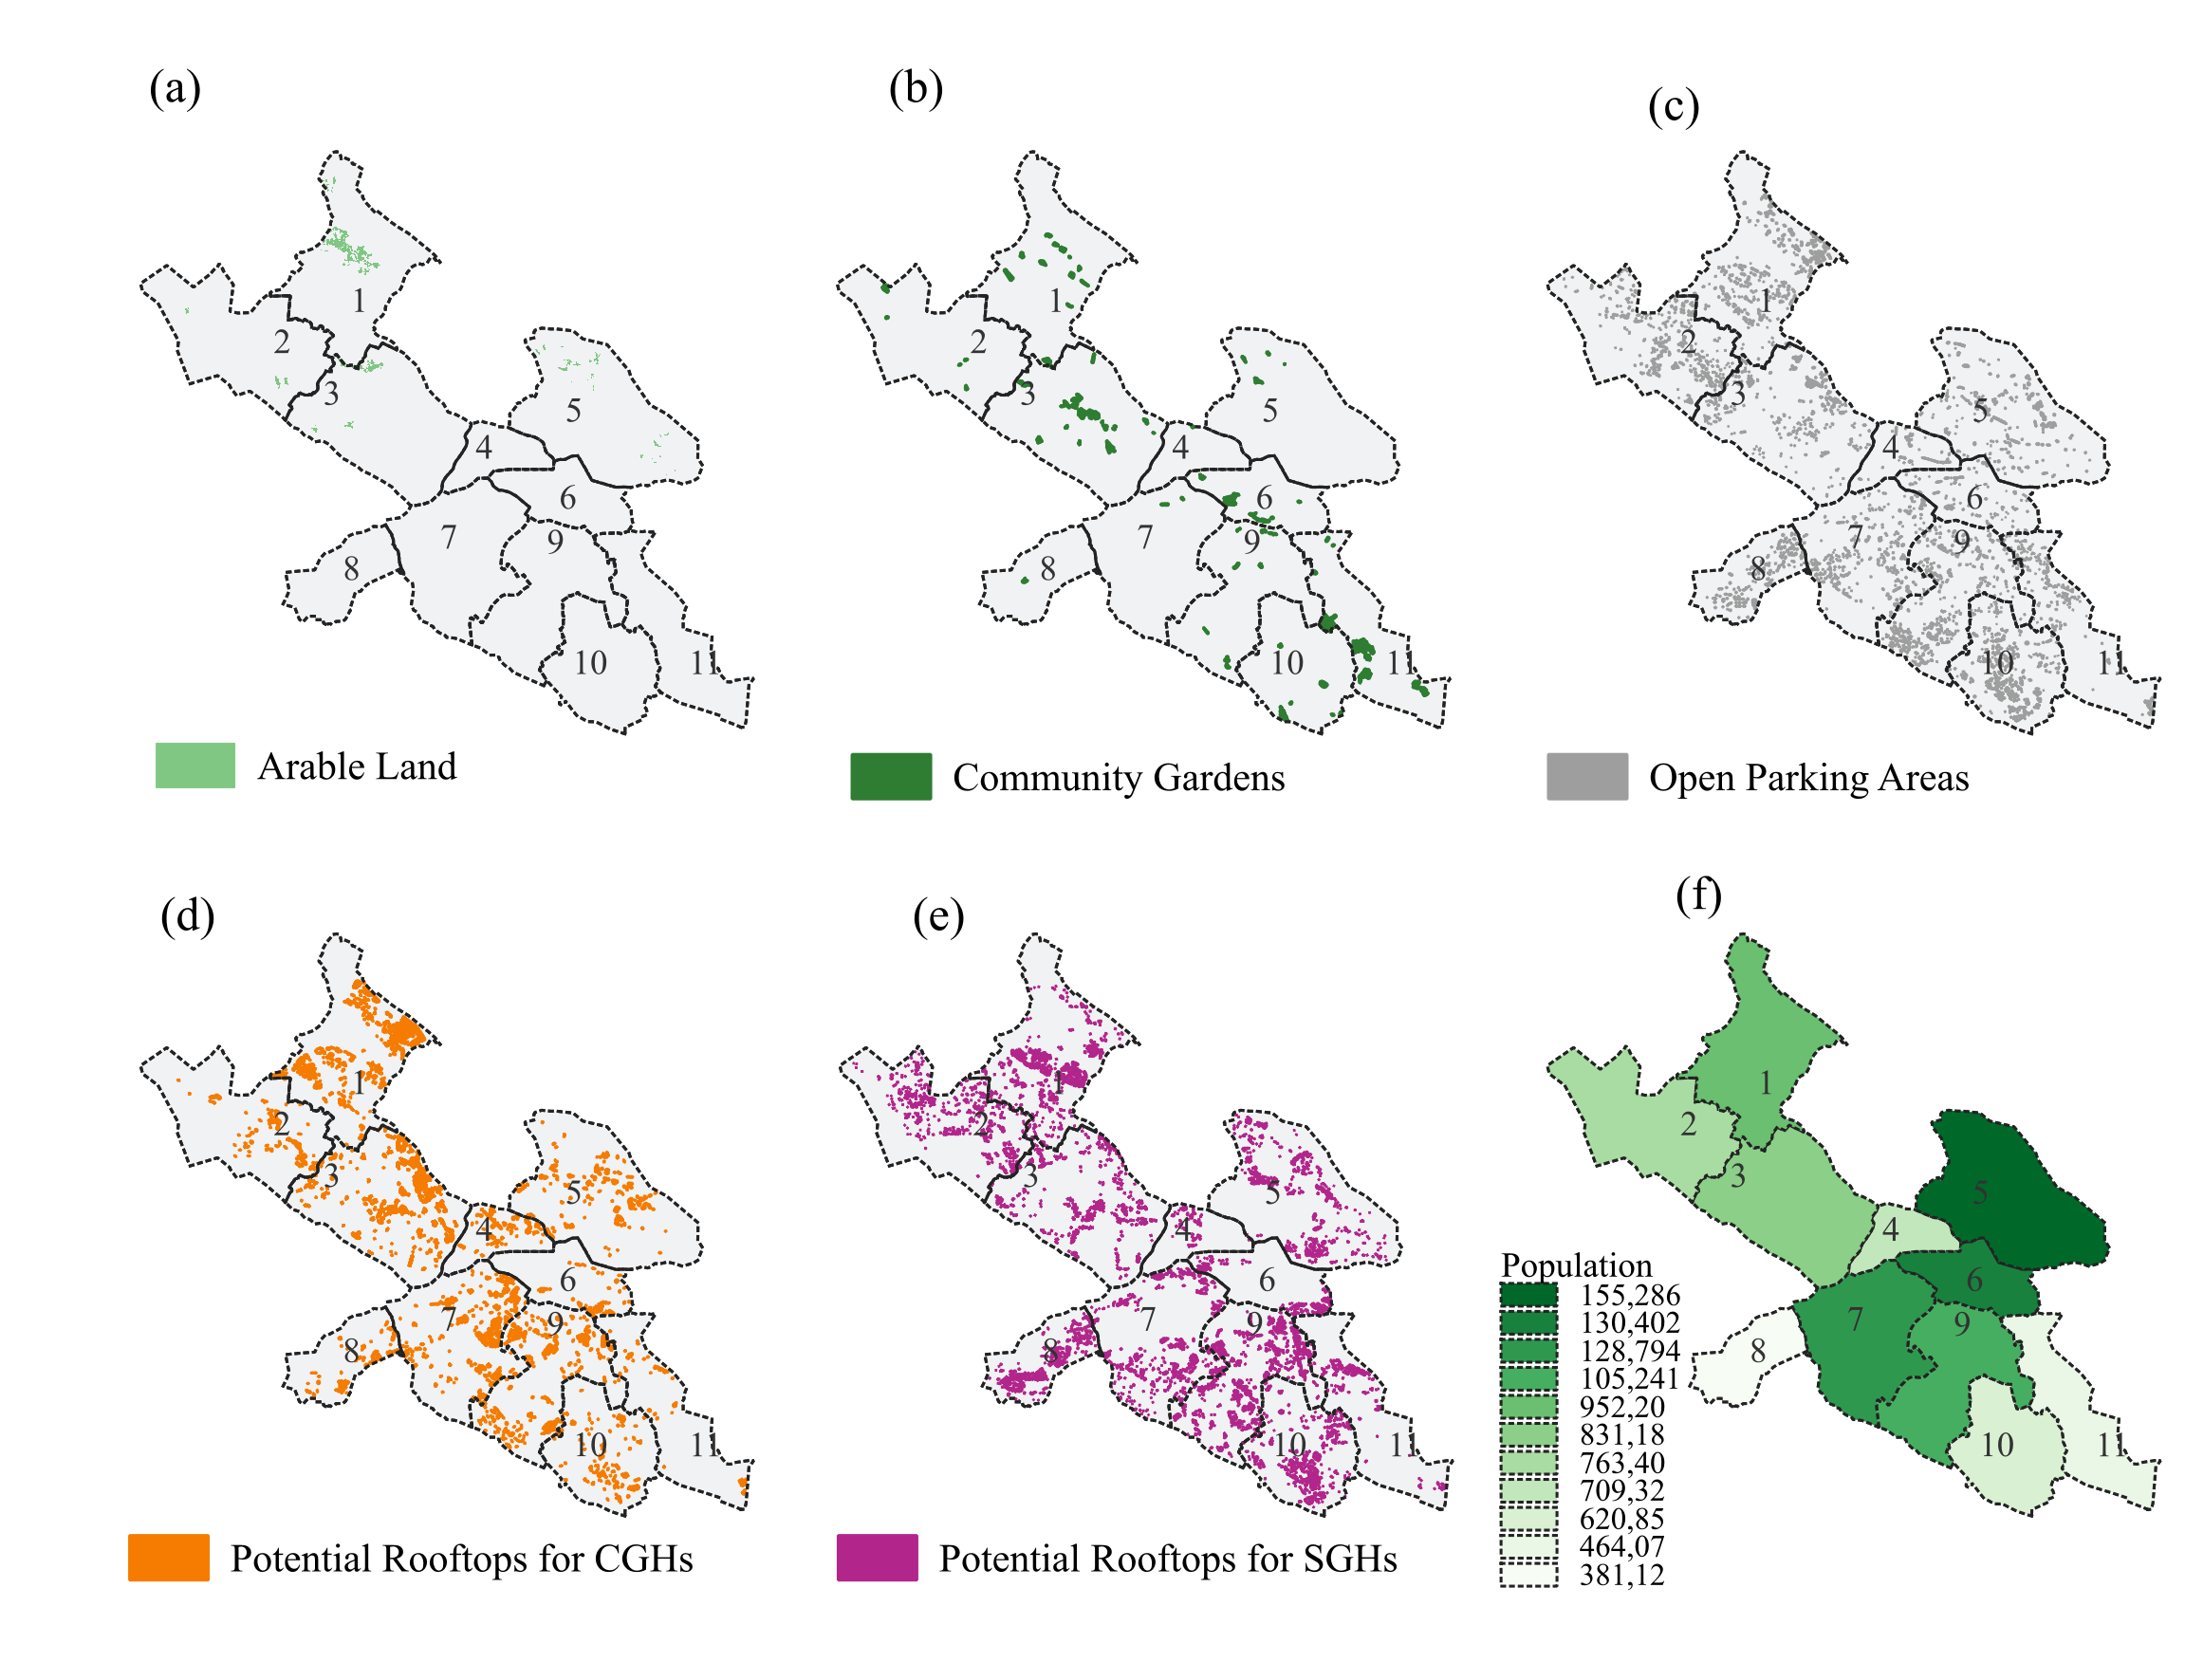
**Fig. S1.** (a) Arable land, (b) community garden, (c) open parking lots, (d) potential rooftops for commercial urban agriculture, (e) potential rooftops for small-scale urban agriculture, and (f) population per district.

***Table S3.*** District-level population, per capita vegetable consumption, and estimated annual vegetable demand in Stockholm.

| District Name | Number of People | Veg. conpt kg/person/year | Veg Demand (t) |
| --- | --- | --- | --- |
| Bromma | 83 118 .00 | 86.59 | 7,197 |
| Enskede-Årsta-Vantör | 105 241 .00 | 9,113 |
| Farsta | 62 085 .00 | 5,376 |
| Hägersten-Älvsjö | 128 794 .00 | 11,152 |
| Hässelby-Vällingby | 76 340 .00 | 6,610 |
| Järva | 95 220 .00 | 8,245 |
| Kungsholmen | 70 932 .00 | 6,142 |
| Norra innerstaden | 155 286 .00 | 13,446 |
| Södermalm | 130 402 .00 | 11,292 |
| Skarpnäck | 46 407 .00 | 4,018 |
| Skärholmen | 38 112 .00 | 3,300 |
| **Total** | **991 937 .00** |  | **85,892** |

***Table S4.*** Estimated vegetable production in Stockholm City.

| District Name | Tomatoes (t) | Cucumber (t) | Lettuce (t) | Bell peppers (t) | Basil (t) | Kale (t) | Potatoes (t) | Carrots (t) | Beets (t) | Leeks (t) | SSR % |
| --- | --- | --- | --- | --- | --- | --- | --- | --- | --- | --- | --- |
| Bromma | 11,910 | 10,209 | 11,162 | 2,042 | 1,106 | 5,336 | 1,601 | 1,128 | 659.5 | 191.0 | 630.0 |
| Enskede-Årsta-Vantör | 8,059 | 6,908 | 7,553 | 1,382 | 748 | 3,611 | 271 | 191 | 111.6 | 32.3 | 316.8 |
| Farsta | 4,086 | 3,502 | 3,829 | 700 | 379 | 1,831 | 407 | 287 | 167.6 | 48.5 | 283.5 |
| Hägersten-Älvsjö | 8,220 | 7,046 | 7,704 | 1,409 | 763 | 3,683 | 55 | 39 | 22.8 | 6.6 | 259.6 |
| Hässelby-Vällingby | 3,909 | 3,350 | 3,663 | 670 | 363 | 1,751 | 338 | 238 | 139.4 | 40.4 | 218.8 |
| Järva | 10,635 | 9,116 | 9,967 | 1,823 | 988 | 4,765 | 2,025 | 1,427 | 834.0 | 241.6 | 507.2 |
| Kungsholmen | 1,784 | 1,529 | 1,672 | 306 | 166 | 799 | 8 | 5 | 3.1 | 0.9 | 102.1 |
| Norra innerstaden | 5,673 | 4,863 | 5,317 | 973 | 527 | 2,542 | 487 | 343 | 200.7 | 58.1 | 156.0 |
| Södermalm | 1,695 | 1,453 | 1,588 | 291 | 157 | 759 | 206 | 145 | 84.7 | 24.5 | 56.7 |
| Skarpnäck | 1,438 | 1,232 | 1,347 | 246 | 133 | 644 | 1,738 | 1,225 | 716.1 | 207.4 | 222.2 |
| Skärholmen | 3,448 | 2,956 | 3,231 | 591 | 320 | 1,545 | 22 | 16 | 9.2 | 2.7 | 367.9 |
| Total | 60,858 | 52,164 | 57,032 | 10,433 | 5,651 | 27,264 | 7,158 | 5,043 | 2,949 | 854 |  |

***Table S5.*** Estimated demand of vegetables per district of Stockholm.

| District Name | **Demand (tonns)** | | | | | | | | | |
| --- | --- | --- | --- | --- | --- | --- | --- | --- | --- | --- |
| Tomatoes | Cucumber | Lettuce | Bell Paper | Basil | Kale | Potatoes | Carrots | Beets | Leeks |
| Bromma | 654 | 510 | 408 | 194 | 87 | 411 | 3,874 | 867 | 136 | 57 |
| Enskede-Årsta-Vantör | 828 | 645 | 517 | 245 | 111 | 520 | 4,905 | 1,098 | 173 | 72 |
| Farsta | 489 | 381 | 305 | 145 | 65 | 307 | 2,894 | 648 | 102 | 42 |
| Hägersten-Älvsjö | 1,014 | 790 | 632 | 300 | 135 | 636 | 6,003 | 1,343 | 211 | 88 |
| Hässelby-Vällingby | 601 | 468 | 375 | 178 | 80 | 377 | 3,558 | 796 | 125 | 52 |
| Järva | 749 | 584 | 468 | 222 | 100 | 470 | 4,438 | 993 | 156 | 65 |
| Kungsholmen | 558 | 435 | 348 | 165 | 74 | 350 | 3,306 | 740 | 116 | 48 |
| Norra innerstaden | 1,222 | 952 | 762 | 362 | 163 | 767 | 7,238 | 1,620 | 255 | 106 |
| Södermalm | 1,026 | 799 | 640 | 304 | 137 | 644 | 6,078 | 1,360 | 214 | 89 |
| Skarpnäck | 365 | 284 | 228 | 108 | 49 | 229 | 2,163 | 484 | 76 | 32 |
| Skärholmen | 300 | 234 | 187 | 89 | 40 | 188 | 1,776 | 398 | 63 | 26 |
| **Total** | **7,807** | **6,081** | **4,870** | **2,311** | **1,042** | **4,900** | **46,234** | **10,346** | **1,627** | **675** |

**References**

Afolabi, K. A. (2019). Productivity of kale (Brassica oleracea var. acephala) and Nile tilapia in aquaponic systems.

Barbosa, G., Gadelha, F., Kublik, N., Proctor, A., Reichelm, L., Weissinger, E., Wohlleb, G., & Halden, R. (2015). Comparison of Land, Water, and Energy Requirements of Lettuce Grown Using Hydroponic vs. Conventional Agricultural Methods. International Journal of Environmental Research and Public Health, 12(6), 6879–6891. https://doi.org/10.3390/ijerph120606879

Ljungqvist, P., et al. (2021). High-latitude greenhouse tomato production in northern Sweden.

Martin, M., & Molin, E. (2018). Assessing the energy and environmental performance of vertical hydroponic farming. Sustainability, 10(11), 4124. <https://doi.org/10.3390/su10114124>

Malik, O. H. (2021). Urban farming: Production comparison of basil and oak leaf lettuce in two hydroponic growing systems. <http://urn.kb.se/resolve?urn=urn:nbn:se:slu:epsilon-s-16403>

Ottosson, L., & Hansson, A. (1981). Cucumber production in greenhouses in Sweden. Acta Horticulturae, 118, 21–27. <https://doi.org/10.17660/ActaHortic.1981.118.4>

Statistics Norway. (2020). Yield of various horticultural crops. https://www.ssb.no

Statistics Sweden (SCB). (2022). Production of potatoes. <https://www.scb.se/en/finding-statistics/statistics-by-subject-area/agriculture-forestry-and-fishery/agricultural-production/production-of-potatoes/>

Statistics Sweden (SCB). (2025). Standard yields of other crops. <https://www.scb.se/en/finding-statistics/statistics-by-subject-area/agriculture-forestry-and-fishery/agricultural-production/standard-yields/>

Selina Wamucii. (2023). Carrot production statistics for Sweden. <https://www.selinawamucii.com/insights/prices/sweden/carrots/>

Dutch Greenhouse Industry. (2023). Green pepper production and yield benchmarks. <https://growpro.dutchgreenhouses.com>
